# 1 **Tuberculosis in farm workers exposed to dairy and beef** 2 **livestock in Colombia**

3 **Catalina Muñoz<sup>1</sup>, Johana Rueda<sup>1</sup>, Luz E. Botero<sup>1,2</sup>, Gloria I. Mejía<sup>1</sup>, Ximena**  
4 **Cardona<sup>3</sup>, Manuel G. Jaramillo<sup>3</sup>, Jaime Robledo<sup>1,2</sup>**

5

## 6 **Summary**

7 The objective of this study was to determine the frequency of tuberculosis (TB) in  
8 workers from dairy and beef livestock farms in the northern part of Colombia.  
9 Tuberculin skin test and an interferon-gamma release assay (IGRA) were used for  
10 diagnosis of latent tuberculosis; sputum samples were taken from respiratory  
11 symptomatic subjects, microbiological and molecular tests were done for diagnosis  
12 of active TB. Absolute frequencies, percentages, and crude prevalence ratios were  
13 calculated, and a robust Poisson Model with adjustment by municipality was made.  
14 In 674 farm workers, latent TB frequency was 35.8%. Variables such as having had  
15 pulmonary TB (PR 2.82, 95% CI 1.90 – 4.17), having been in contact with people  
16 with active TB (PR 1.57, 95% CI 1.24 – 1.98), and having performed some  
17 undergraduate or postgraduate study (PR 1.6, 95% CI 1.03 – 2.49), were  
18 significantly associated with latent TB. No active tuberculosis disease was confirmed  
19 in symptomatic respiratory patients. The exposure level to cattle was not  
20 significantly associated with latent TB infection. In conclusion, in the studied  
21 population exposure to cattle was not a risk factor for TB, other factors commonly  
22 found in general population exposed to human TB were demonstrated.

23

## 24 **Author summary**

25 Zoonotic TB is a disease caused by the transmission of the *M. bovis* bacteria that is  
26 part of the Mycobacterium tuberculosis Complex, through contact with cattle to  
27 humans, by the consumption of unpasteurized dairy products from infected animals  
28 or by inhalation of aerosols exhaled by sick animals.

29 This study investigated the frequency of TB in human population related to cattle, in  
30 order to determine if there were risk factors related to TB infection or disease. Finding  
31 that there was no significant relationship between being exposed to cattle and having  
32 latent TB. However, the results of this study together with other research reported in  
33 the literature suggest that research on zoonotic and bovine TB should be continued,  
34 especially about epidemiology, diagnostic methods, health systems and  
35 interventions coordinated with veterinary services.

36

## 37 **Introduction**

38 Tuberculosis (TB) is the ninth cause of death and the first cause of death due to  
39 infectious diseases worldwide. In 2017, ten million people became ill with TB and 1.3  
40 million died from this disease [1].

41

42 Approximately one-quarter of the world's population (1.7 billion) has latent TB, that  
43 is, they are infected with the bacillus but have not yet become ill or can transmit the  
44 infection; 5 to 15% of this population will develop an active disease throughout life  
45 [2]. The National Public Health Surveillance System of Colombia (SIVIGILA)

46 reported 14,420 new cases of TB in 2018, out of which 2,609 cases were said to  
47 have occurred in Antioquia [3].

48

49 Tuberculosis is caused by diverse species belonging to *Mycobacterium tuberculosis*  
50 complex (CMTB). In humans, the species that cause most cases is *Mycobacterium*  
51 *tuberculosis* (MTB), followed by *Mycobacterium bovis*, which is, in turn, the causative  
52 agent of bovine TB in animals and of zoonotic TB in humans [1,4]. Cattle are the  
53 definitive hosts for *M. bovis*, but other domestic and wild mammals can also be  
54 infected. The transmission of bovine TB to humans is mainly due to the consumption  
55 of unpasteurized dairy products from infected animals or by the inhalation of aerosols  
56 exhaled by diseased animals. Less common forms to transmit the bovine TB are the  
57 consumption of undercooked contaminated beef and direct percutaneous contact,  
58 associated mainly with the bacteria infecting a wound [5].

59

60 Currently, the importance of studying zoonotic TB in the context of *One Health*  
61 approach has facilitated the implementation of health measures to improve food  
62 safety, such as the general pasteurization of milk and the control of bovine TB in  
63 animal reservoirs that improves its control [6]. However, the risk of disease in  
64 humans persists particularly in specific occupational categories in the livestock  
65 sector that require close and constant contact with potentially infected animals as  
66 zotechnicians, milkers, livestock managers, and staff at animal management plants  
67 [7].

68

69 According to the Colombian Agricultural Institute (ICA), there are confirmed cases of  
70 *M. bovis* in bovines every year; this means a potential risk of infection with  
71 tuberculosis for people associated with these animals. However, the real situation of  
72 *M. bovis* in livestock in the country is mostly unknown. In Colombia, epidemiological  
73 surveillance of human TB is restricted to the identification of CMTB but not to the  
74 differentiation of the species that cause the disease, which does not allow to identify  
75 human cases of TB caused by *M. bovis*. All of the above makes it necessary to know  
76 better the contribution of bovine TB to human TB cases in the country that allow re-  
77 evaluating current health policies, generate better health controls, and educate the  
78 population in this economic sector. Antioquia is a department located in the  
79 northwest of Colombia. Part of its economy has developed around livestock activity,  
80 and it currently has the highest livestock production in the country, with 11.75% of  
81 the national bovine population [8]. So far, there is no information on the frequency of  
82 TB in people exposed to cattle in Antioquia.

83

84 This study aimed to determine the frequency of TB in a human population exposed  
85 to dairy and beef livestock in Antioquia, Colombia.

86

## 87 **Methodology**

88 An analytical cross-sectional study was carried out between February 2017 and  
89 February 2018. The study involved people who worked on farms associated to  
90 *Colanta*® a cooperative of dairy farms and the “National program for the control and  
91 eradication of bovine tuberculosis and the certification of farms free of this disease”

92 offered by the ICA, in addition, technical staff from other institutions in the agricultural  
93 area located in Antioquia was included.

94 **Characteristics of the population:** The study included participants over 18 years  
95 old, who had direct or indirect contact with dairy and beef livestock. Individuals who  
96 were unable to attend the tuberculin skin test (TST) read after 48 to 72 hours, who  
97 did not respond adequately to the clinical-epidemiological survey and those who  
98 refused to participate in the study were excluded (Fig. 1).

99 **Figure 1.** Admitted and analyzed population

100

101 All participants completed a clinical-epidemiological survey and signed two informed  
102 consents: one regarding the sampling of venous blood for the detection of interferon-  
103 gamma (IFN- $\gamma$ ) with QuantiFERON®-TB GOLD PLUS (QFT®-Plus), and the other,  
104 regarding the application of the TST test.

105

106 **Exposure level**

107 The exposure level of the population to cattle were stratified according to a published  
108 work [9] and adjusted accordingly, as follows: (i) High degree of exposure  
109 (Individuals directly exposed to cattle, in full-time works, mainly indoors.) (ii) Average  
110 degree of exposure: (Individuals directly exposed to cattle, in part-time works not  
111 exclusive to livestock, usually outdoors. (iii) Low degree of exposure: Individuals  
112 occasionally and indirectly exposed, during one hour or less, that usually perform  
113 tasks unrelated to cattle handling).

114

115 **Latent tuberculosis diagnosis**

116 A QFT®-Plus test [10] was performed. The amount of IFN- $\gamma$  (IU/ml) present in the  
117 measuring tubes due to the reaction of ESAT-6 and CFP-10 proteins (antigens  
118 associated with CMTB) was measured with an ELISA method [10]. Also, the TST  
119 test was performed using the Mantoux method [11], with an intradermal injection of  
120 5 IU (0.1 mL) of purified protein derivative (Manufactured by BB-NCIPD-LTD 1504  
121 Sofia, Bulgaria) on the forearm. After 72 hours, the reading was conducted by  
122 previously trained personal. The results were recorded in millimeters and considered  
123 positive when the induration was equal to or greater than 10 millimeters [12,13].  
124 According to WHO, a positive result on TST or IGRA leads to a diagnosis of latent  
125 TB [14].

126

### 127 **Active tuberculosis diagnosis**

128 A sample of sputum was collected from symptomatic respiratory patients (SR) [15],  
129 Decontamination and liquefaction processes were carried out per sample, using the  
130 N-acetyl-L-cysteine method, together with 4% sodium hydroxide [16]. The sample  
131 was evaluated microscopically with bacilloscopy with Auramine-Rhodamine stain  
132 and then inoculated in solid (Lowenstein Jensen) and liquid (MGIT Becton-Dickinson  
133 tubes, Bactec MGIT 960®, Sparks, MA, USA) culture medium for microorganism  
134 recovery and subsequent identification. A molecular test was also conducted with all  
135 sputum samples using the Xpert MTB/Rif® method to detect the CMTB bacteria.  
136 Participants were also evaluated to identify other clinical manifestations that may  
137 indicate extrapulmonary TB.

138

### 139 **Statistical analysis**

140 The information obtained from the clinical-epidemiological survey was tabulated in a  
141 Microsoft Excel 2016 database. This information was transferred to the IBM SPSS  
142 Statistics 25.0 and Stata program 15.0 to perform the necessary statistical analyses.

143

144 Absolute frequencies and percentages were used for the descriptive analysis of  
145 qualitative variables. To evaluate the variables that were associated with the latent  
146 TB positivity, crude prevalence ratios were used, and a robust Poisson Model was  
147 made with a standard error adjustment by municipality grouping. Variables with  
148  $p < 0.25$  values (Hosmer and Lemeshow criteria) were included in the model. A 0.05  
149 alpha was considered for statistically significant associations.

150

151 Agreement between QFT®-Plus and TST tests was assessed by using Kappa  
152 statistic ( $\kappa$ ). It was considered that a 'poor' agreement was  $\kappa \leq 0.20$ , an 'acceptable'  
153 agreement was  $0.20 < \kappa \leq 0.40$ , a 'moderate' agreement was  $0.40 < \kappa \leq 0.60$ , a 'good'  
154 agreement was  $0.60 < \kappa \leq 0.80$ , and a 'very good' agreement was  $0.80 < \kappa \leq 1$ . [17].

155

## 156 **Ethical considerations**

157 According to Colombian Resolution No. 8430 of 1993, the individuals participating in  
158 this study were exposed to minimal risk. The Research Ethics Committee of the  
159 Corporation for Biological Research and the Research Ethics Committee of the  
160 School of Health Sciences of the Universidad Pontificia Bolivariana in Medellín,  
161 Colombia approved the study. This study had research purposes and sought the  
162 collective benefit of the community directly involved in livestock activities of the  
163 scientific community and the general population.

164

## 165 **Results**

166 The eligible population was constituted by 1080 individuals located in the department  
167 of Antioquia. Out of these, 1000 were invited to participate. Seven hundred people  
168 (700) (74%) came from different farms in the department, and 300 (26%) came from  
169 institutions responsible for the production, monitoring, and control of dairy and beef  
170 production. The 326 individuals excluded did not meet the inclusion criteria or  
171 decided not to participate. In total, data from 674 individuals were analyzed (Figure  
172 1).

173

174 The age of the participants ranged from 18 to 83 years, 79.6% were men, and 44.2%  
175 of the participants in the study went to primary school (Table 1).

176

177 **Table 1.** Demographic characteristics of the population (N=, 674).

| VARIABLE                             | n   | %    |
|--------------------------------------|-----|------|
| Males                                | 537 | 79.6 |
| Age                                  |     |      |
| ≤34                                  | 208 | 30.9 |
| 35 - 49                              | 265 | 39.2 |
| 50 - 64                              | 163 | 24.2 |
| ≥65                                  | 38  | 5.6  |
| Educational Level                    |     |      |
| None                                 | 32  | 4.7  |
| Primary School                       | 298 | 44.2 |
| High School                          | 183 | 27.2 |
| Technical or Technological education | 59  | 8.8  |
| Undergraduate or Postgraduate        | 102 | 15.1 |

178 N: population size, n: sample size

179



180 Regarding the geographical distribution of the population, 51.6% came from the  
181 northern region of the Department of Antioquia (Fig. 2), specifically the municipalities  
182 of San Pedro de los Milagros, Entrerriós, Santa Rosa de Osos, Don Matías,  
183 Yarumal, Belmira and San José de la Montaña.

184

185 **Figure 2.** Distribution of the population of study according to their regions of origin  
186 in Antioquia, Colombia.

187

188 Most participants, 86.8% had been vaccinated with BCG, 6.8% reported previous  
189 close contact with a case of pulmonary TB, and 0.9% reported to have been  
190 previously diagnosed with TB. Most of the population, 85.6%, were directly exposed  
191 to cattle, and 69% reported being exposed to sick cattle. Out of all participants,  
192 41.2% reported consumption and preparation of unpasteurized dairy products, and  
193 95.8% consumed beef (Table 2).

194

195 **Table 2.** Clinical-epidemiological characteristics of the population (N=674).

| VARIABLE                                             | n   | %    |
|------------------------------------------------------|-----|------|
| BCG vaccine                                          | 585 | 86.8 |
| Previously diagnosed TB                              | 6   | 0.9  |
| Contact with people with TB                          | 46  | 6.8  |
| Time spent working on a farm or institution (months) |     |      |
| ≤24                                                  | 176 | 26.1 |
| 25 - 96                                              | 162 | 24.0 |
| 97 - 240                                             | 189 | 28.0 |
| >241                                                 | 147 | 21.8 |
| Direct exposure to cattle                            | 577 | 85.6 |
| Exposure to sick cattle*                             | 465 | 69.0 |
| Use of mask during cattle care                       | 119 | 17.7 |
| Exposure level to cattle                             |     |      |

|                                 |     |      |
|---------------------------------|-----|------|
| Low                             | 41  | 6.1  |
| Medium                          | 106 | 15.7 |
| High                            | 527 | 78.2 |
| Raw milk consumption            | 206 | 30.6 |
| Products derived from raw milk  |     |      |
| No consumption – No preparation | 291 | 43.2 |
| Consumption or preparation      | 105 | 15.6 |
| Consumption and preparation     | 278 | 41.2 |
| Beef consumption                | 646 | 95.8 |
| Beef cooking term (N=646)       |     |      |
| Undercooked beef                | 72  | 11.1 |
| Cooked                          | 128 | 19.8 |
| Well cooked                     | 446 | 69.0 |

196 N: Population size, n: Sample size

197 \*Sick cattle with any type of condition.

198

199 Positive results by any of the latent TB tests performed (TST and QFT®-Plus) were  
 200 in 35.8% of individuals, 32.9% tested positive with TST and 10.7% with QFT®-Plus  
 201 (Table 3). Out of the total population, 8% tested positive in both tests, (Kappa  
 202 coefficient was 0.237).

203

204 **Table 3.** Agreement between TST and QFT®-Plus (N=674)

| QFT®-Plus    | Tuberculin         |                    | Total             |
|--------------|--------------------|--------------------|-------------------|
|              | Positive           | Negative           |                   |
| Positive     | 53 (7,9%)          | 19 (2,8%)          | 72 (10,7%)        |
| Negative     | 169 (25,1%)        | 433 (64,2%)        | 602 (89,3%)       |
| <b>Total</b> | <b>222 (32,8%)</b> | <b>452 (67,1%)</b> | <b>674 (100%)</b> |

205 TST and QFT®-Plus (Kappa Coefficient: 0.237, 95% CI: 0.169 – 0.306)

206

207 Significantly associated variables with latent TB were: prior diagnosis of TB (PR  
 208 2.82, CI 95% 1.90 – 4.17) contact with people with TB (PR 1.57, CI 95% 1.24 – 1.98),

209 and completion of undergraduate or postgraduate studies (PR 1.6, CI 95% 1.03 – 6  
210 2.49). (Table 4).

211

212 **Table 4.** Association of sociodemographic and epidemiological variables to latent  
213 tuberculosis in the study population (N=674).

| VARIABLES                            | n/N (%)        | PR<br>(raw) | CI 95% |      | PR*<br>(adjusted) | CI 95% |      | Value<br><i>p</i> |
|--------------------------------------|----------------|-------------|--------|------|-------------------|--------|------|-------------------|
| <b>Sex</b>                           |                |             |        |      |                   |        |      |                   |
| Female                               | 43/138 (31.2)  | 1           |        |      |                   |        |      |                   |
| Male                                 | 197/536 (36.8) | 1.18        | 0.85   | 1.63 | 1.32              | 0.97   | 1.77 | 0.062             |
| <b>Age (in groups)</b>               |                |             |        |      |                   |        |      |                   |
| <34                                  | 63/208 (30.3)  | 1           |        |      | 1                 |        |      |                   |
| 35 - 49                              | 106/265 (40.0) | 1.32        | 0.98   | 1.77 | 1.34              | 0.99   | 1.81 | 0.052             |
| 50 - 64                              | 60/163 (36.8)  | 1.22        | 0.86   | 1.72 | 1.25              | 0.91   | 1.72 | 0.171             |
| ≥65                                  | 11/38 (28.9)   | 0.96        | 0.57   | 1.60 | 1.03              | 0.66   | 1.60 | 0.897             |
| <b>Education level</b>               |                |             |        |      |                   |        |      |                   |
| None                                 | 8/32 (25.0)    | 1           |        |      | 1                 |        |      |                   |
| Primary school                       | 97/298 (32.6)  | 1.3         | 0.84   | 2.02 | 1.11              | 0.73   | 1.69 | 0.617             |
| High school                          | 70/183 (38.3)  | 1.53        | 0.90   | 2.60 | 1.4               | 0.85   | 2.33 | 0.191             |
| Technical or technological education | 20/59 (33.9)   | 1.36        | 0.79   | 2.34 | 1.22              | 0.75   | 1.99 | 0.420             |
| Undergraduate or Postgraduate        | 45/102 (44.1)  | 1.76        | 1.15   | 2.70 | 1.6               | 1.03   | 2.49 | 0.037**           |
| <b>Previously diagnosed TB</b>       |                |             |        |      |                   |        |      |                   |
| No                                   | 234/668 (35.0) | 1           |        |      | 1                 |        |      |                   |
| Yes                                  | 6/6 (100.0)    | 2.85        | 2.40   | 3.40 | 2.82              | 1.90   | 4.17 | <0.001*<br>*      |
| <b>Contact with people with TB</b>   |                |             |        |      |                   |        |      |                   |
| No                                   | 215/628 (34.2) | 1           |        |      | 1                 |        |      |                   |
| Yes                                  | 25/46 (54.3)   | 1.59        | 1.31   | 1.92 | 1.57              | 1.24   | 1.98 | <0.001*<br>*      |
| <b>Direct exposure to cattle</b>     |                |             |        |      |                   |        |      |                   |
| No                                   | 31/97 (32.0)   | 1           |        |      | 1                 |        |      |                   |
| Yes                                  | 209/577 (36.2) | 1.13        | 0.68   | 1.90 | 1.64              | 0.89   | 3.02 | 0.111             |
| <b>Raw milk consumption</b>          |                |             |        |      |                   |        |      |                   |
| No                                   | 162/468 (34.6) | 1           |        |      | 1                 |        |      |                   |
| Yes                                  | 78/206 (37.9)  | 1.09        | 0.88   | 1.36 | 1.15              | 0.91   | 1.45 | 0.240             |

214 PR: Prevalence Ratios, N: Population size, n: sample size, CI: Confidence Interval

215 \*Robust Poisson model with error adjustment by municipality

216 \*\* $p < 0.05$

217

218 The variable "Exposure Level" was classified as a variable of occupational exposure  
219 to cattle. There was no statistically significant association with the variable "Latent  
220 TB" (value p-0.291) (Table 5).

221

222 **Table 5.** Association between the exposure level to cattle and the positivity of tests  
223 for latent TB

| VARIABLE                 | Positive Results - TST or QFT |         |        |                    |       |
|--------------------------|-------------------------------|---------|--------|--------------------|-------|
|                          | n/N                           | %       | IC 95% | Value p            |       |
| Exposure level to cattle | <b>Medium</b>                 | 32/105  | 30.5   | 1                  | 0.291 |
|                          | <b>High</b>                   | 191/528 | 36.2   | 1.44 (0.92 – 2.26) |       |
|                          | <b>Low</b>                    | 18/41   | 43.9   | 1.18 (0.87 – 1.61) |       |

224 N: Population size, n: sample size, CI: Confidence Interval

225

226 Twenty-four (3.6%) participants included in the study had respiratory symptoms  
227 compatible with TB. The studies did not find positivity for CMTB microorganisms in  
228 the microbiological and molecular tests of SR's sputum samples; therefore, not  
229 active pulmonary TB cases were confirmed. Tests related to the symptomatology of  
230 individuals, aimed at detecting pathogens other than mycobacteria were not  
231 performed.

232

## 233 **Discussion**

234 Human TB is still a problem worldwide, and Colombia is not an exception. Most  
235 cases are caused by *M. tuberculosis*, but *M. bovis* has been identified as a cause of  
236 TB in humans in different regions of the world [2]. According to the latest WHO report,  
237 approximately one-quarter (25%) of the world's population has latent TB (2). The  
238 present study found that approximately one-third (35.8%) of the population exposed

239 to bovines is infected; However, the prevalence of latent TB in other Colombian  
240 populations is higher. A study conducted by Ochoa and collaborators in 2017 [18]  
241 showed that, in Medellin, the prevalence of latent TB in health staff was 62%.  
242 Likewise, a study conducted by del Corral and collaborators in 2009 [19] found that  
243 the prevalence of latent TB was 65,9% among household contacts of TB patients  
244 compared with 42.7% of latent TB of the general population in a population in urban  
245 location in Medellín.

246

247 In this study, 674 people were analyzed. Out of these, 32.9% tested positive with  
248 TST test and 10.7% with IGRA. Compared to other studies in similar populations,  
249 the frequency of latent TB was lower. Torres-González and collaborators found that  
250 in a group of 311 dairy farmworkers in Mexico, the prevalence of latent TB was  
251 76.2% with TST and 58.5% with IGRA [9]. Likewise, Oren and collaborators  
252 analyzed 109 agricultural migrant workers from the US-Mexico border. They found  
253 that the prevalence of latent TB was 34% with TST and 50% with IGRA [17]. One  
254 of the possible reasons for the low frequency of latent TB found in this study may be  
255 the selected population. The farms under certification for bovine tuberculosis were  
256 91%, that is to say, being free of bovine TB according to the national policies. In this  
257 context, the human population studied would have a lower risk of becoming infected.  
258 On the other hand, a significant association was found between a previous contact  
259 of people with active pulmonary TB patients and having latent TB, which confirm  
260 data from studies in general population [20,21].

261

262 Only 8% of the study population tested positive with TST and QFT®-Plus  
263 simultaneously, demonstrating a 'regular' agreement ( $k=0.24$ ) between the two tests.  
264 These findings are consistent with other studies. In 2013, a study by Jo and  
265 collaborators [22] found that the agreement between these tests was 'regular' ( $k=$   
266  $0.22$ ); in 2017, Ochoa and collaborators [18] found a 'moderate' agreement ( $k=0.47$ )  
267 between these two tests on health care workers. According to WHO guidelines,  
268 regardless of the concordance between TST and QFT, both tests could be used to  
269 diagnose latent TB; however, the findings of this study do not allow us to conclude  
270 which of the two tests is more advisable to make a diagnosis of latent TB in people  
271 exposed to cattle.

272

273 The frequency in males was 79.6% (537/674), given that most people who carry out  
274 activities associated with livestock production are usually male. This is coherent with  
275 other studies where the frequency of males was also high [9,17,23–25]. Likewise,  
276 according to WHO, worldwide, men have a significantly higher risk of contracting TB  
277 compared to women [26]. However, when analyzing the relationship between gender  
278 and the presence of latent TB, no significant association was demonstrated.

279

280 In relation to the level of education, the primary school was the highest educational  
281 level that a large proportion of individuals had reached (44.2%). This is common in  
282 rural contexts, where people usually start working from a very early age to support  
283 their families and increase incomes. However, 15% of participants carried out  
284 undergraduate and graduate studies. A statistically significant association between  
285 this academic level and latent TB was found, which may be explained by the fact

286 that professionals included in the study were mainly veterinary doctors and  
287 zotechnicians. These individuals are constantly and directly exposed to cattle,  
288 which may be indicative of greater exposure to sick animals and a higher possibility  
289 of infection with mycobacteria.

290

291 According to the time spent working with cattle, 28% (189/674) of the participating  
292 population had been carrying out livestock activities for more than 8 years (97 and  
293 240 months). Although this should increase the likelihood of becoming infected with  
294 CMTB bacteria, no significant association between time working with cattle and  
295 having latent TB was demonstrated. Nevertheless, data obtained by Torres and  
296 collaborators indicated that habits of working with animals constitute a significant risk  
297 of having latent TB [9].

298

299 Previous studies have shown that the main source of transmission of zoonotic TB is  
300 the consumption of unpasteurized milk and its derivatives [27]; however, this study  
301 did not show that there is a risk of having latent TB with the consumption of  
302 unpasteurized products. Even so, the importance to continue educating people to  
303 eat appropriately pasteurized foods should be stressed. It is worth considering that  
304 some of the participants may have deliberately denied the consumption of raw milk  
305 given that farm owners usually prohibit this type of activity because of the risk that  
306 milk-borne pathogens represent [28].

307

308 A low percentage of the population involved (17.7%) reported the use of a mouth  
309 mask when working with cattle. Despite this being an essential protective measure

310 to avoid the transmission of the microorganism, no statistically significant association  
311 with latent TB was found [5].

312

313 The risk of latent TB was also found in individuals who reported to have been treated  
314 for active TB before the study (0.9% - 6 individuals out of 674). TST and IGRA tests  
315 remained positive in these cases because of the positive hypersensitivity response  
316 evidenced through TST after exposure to the agent [29] and the fact that IGRA can  
317 also remain positive for a considerable period in people who have received treatment  
318 for the disease [30].

319

320 Twenty-four (3.6%) of the 674 participants were listed as SR. Microbiological and  
321 molecular analyses did not demonstrate the presence of *M. bovis* in any individual,  
322 even though it is the bacteria expected to circulate in this type of population.  
323 Nevertheless, the findings revealed a higher prevalence of latent TB in the  
324 population of study than in the general population. The tests used to diagnose latent  
325 TB did not allow us to determine whether the infection is caused by *M. bovis* but  
326 demonstrated that there is a transmission of CMTB bacteria in this population. As it  
327 cannot be concluded that latent TB is transmitted by cattle, there is a need to seek  
328 and develop new techniques aimed at detecting latent TB caused by *M. bovis*.

329

330 The limitations of this study include the impossibility to perform the second TST test  
331 to detect the booster effect recommended by WHO, which increases TST positivity  
332 between 10 and 15% [31,32]. Most of the selected participants belonged to farms  
333 involved in the TB program promoted by the ICA, whose characteristics impede the



334 extrapolation of results to the general population exposed to livestock. For this  
335 reason, it is necessary future research that involves individuals working with  
336 livestock from the general population, in order to see if the characteristics of the  
337 population vary or remain and to understand the impact of exposure to cattle on  
338 human health, particularly in regards to TB.

339

340 In conclusion, this study did not find a significant relationship between exposure to  
341 cattle and active or latent TB. Our results suggest that people who adhere to bovine  
342 TB programs may have better protective measures when working with cattle. Further  
343 research in the field of zoonotic and bovine TB is required, especially concerning its  
344 epidemiology. It is also essential to study other animals in wildlife reservoirs that may  
345 expand the scope of transmission. There is also a need for new diagnostic methods  
346 and coordinated interventions with veterinary services and health systems in rural  
347 areas where public policies fail to meet their objectives.

348

### 349 **Acknowledgments:**

350 To the Colombian Agricultural Institute (ICA) and the Directorate of Risk Factors of  
351 the Health and Social Protection Section of Antioquia for the information and support  
352 provided, which allowed the completion of this project.

353

### 354 **Financing**

355 The Administrative Department of Science, Technology, and Innovation -  
356 Colciencias, Colombia, approved the financing of the project "Prevalence of latent

357 and active bovine tuberculosis among workers exposed to cattle on dairy farms in  
358 Antioquia, Colombia" with code 221374456133 and contract 737-2016.

359

360

361

## 362 **Bibliography**

- 363 1. World Health Organization. Global tuberculosis report 2018. WHO [Internet].  
364 2018;12. Available from: [https://www.who.int/tb/publications/global\\_report/en/](https://www.who.int/tb/publications/global_report/en/)
- 365 2. Organización Mundial de la Salud OMS. Tuberculosis. Datos y cifras [Internet].  
366 2018 [cited 2019 Apr 25]. Available from: [https://www.who.int/es/news-](https://www.who.int/es/news-room/fact-sheets/detail/tuberculosis)  
367 [room/fact-sheets/detail/tuberculosis](https://www.who.int/es/news-room/fact-sheets/detail/tuberculosis)
- 368 3. INS-Instituto Nacional de Salud. Vigilancia Rutinara Historica 2009 - 2019 -  
369 Evento 998 [Internet]. 2019 [cited 2019 Apr 17]. Available from:  
370 [http://portalsivigila.ins.gov.co/sivigila/documentos/Docs\\_1.php](http://portalsivigila.ins.gov.co/sivigila/documentos/Docs_1.php)
- 371 4. Sinha P, Gupta A, Prakash P, Anupurba S, Tripathi R, Srivastava GN.  
372 Differentiation of Mycobacterium tuberculosis complex from non-tubercular  
373 mycobacteria by nested multiplex PCR targeting IS6110, MTP40 and 32kD  
374 alpha antigen encoding gene fragments. BMC Infect Dis. 2016 Mar 12;16:123.
- 375 5. de la Rúa-Domenech R. Human Mycobacterium bovis infection in the United  
376 Kingdom: Incidence, risks, control measures and review of the zoonotic  
377 aspects of bovine tuberculosis. Tuberculosis (Edinb). 2006 Mar;86(2):77–109.
- 378 6. Organización Mundial de la Salud (OMS) O de las NU para la, (OIE) A y la A  
379 (FAO) y OM de SA. Hoja de Ruta Contra la Tuberculosis Zoonótica [Internet].



- 404 <https://www.cdc.gov/tb/esp/topic/testing/tbtesttypes.htm>
- 405 12. CDC. Tipos de pruebas de detección de tuberculosis | Prueba cutánea de la  
406 tuberculina [Internet]. 2016. Available from:  
407 <https://www.cdc.gov/tb/esp/topic/testing/tbtesttypes.htm>
- 408 13. CDC. Eliminación de la TB; Prueba cutánea de la tuberculina. 2012; Available  
409 from:  
410 [https://www.cdc.gov/tb/esp/publications/factsheets/testing/skintesting\\_es.pdf](https://www.cdc.gov/tb/esp/publications/factsheets/testing/skintesting_es.pdf)
- 411 14. Global Tuberculosis Programme, World Health Organization. Guidelines on  
412 the management of latent tuberculosis infection. 2015. 33 p.
- 413 15. Fadul S, López M. Protocolo de Vigilancia en Salud Pública-Tuberculosis. INS  
414 Instituto Nac Salud [Internet]. 2017;(4):1–42. Available from:  
415 <https://www.ins.gov.co/buscador-eventos/Informesdeevento/Tuberculosis>  
416 2017.pdf
- 417 16. Kent P, Kubica G, Centers for Disease Control (U.S). Public health  
418 mycobacteriology: a guide for the level III laboratory. Atlanta Ga.: U.S. Dept.  
419 of Health and Human Services Public Health Service Centers for Disease  
420 Control; 1985.
- 421 17. Oren E, Fiero MH, Barrett E, Anderson B, Nuñez M, Gonzalez-Salazar F.  
422 Detection of latent tuberculosis infection among migrant farmworkers along  
423 the US-Mexico border. BMC Infect Dis. 2016 Dec 3;16(1):630.
- 424 18. Ochoa J, León AL, Ramírez IC, Lopera CM, Bernal E, Aarbeláez MP.  
425 Prevalence of tuberculosis infection in healthcare workers of the public  
426 hospital network in Medellín, Colombia: a Bayesian approach. Epidemiol  
427 Infect. 2017 Apr 9;145(06):1095–106.

- 428 19. del Corral H, París SC, Marín ND, Marín DM, López L, Henao HM, et al. IFN $\gamma$   
429 Response to Mycobacterium tuberculosis, Risk of Infection and Disease in  
430 Household Contacts of Tuberculosis Patients in Colombia. Pai M, editor. PLoS  
431 One [Internet]. 2009 Dec 14;4(12):e8257. Available from:  
432 <https://dx.plos.org/10.1371/journal.pone.0008257>
- 433 20. Glaziou P, Sismanidis C, Floyd K, Raviglione M. Global epidemiology of  
434 tuberculosis. Cold Spring Harb Perspect Med. 2015 Oct 30;5(2):a017798.
- 435 21. Highsmith HY, Starke JR, Mandalakas AM. Tuberculosis. In: Kendig's  
436 Disorders of the Respiratory Tract in Children. Content Repository Only!; 2019.  
437 p. 475-497.e5.
- 438 22. Jo K-W, Hong Y, Park JS, Bae I-G, Eom JS, Lee S-R, et al. Prevalence of  
439 Latent Tuberculosis Infection among Health Care Workers in South Korea: A  
440 Multicenter Study. Tuberc Respir Dis (Seoul). 2013 Jul;75(1):18–24.
- 441 23. Kazoora HB, Majalija S, Kiwanuka N, Kaneene JB. Knowledge, Attitudes and  
442 Practices Regarding Risk to Human Infection due to Mycobacterium bovis  
443 among Cattle Farming Communities in Western Uganda. Zoonoses Public  
444 Health. 2016 Dec;63(8):616–23.
- 445 24. Leal Bohorquez AF, Castro Osorio CM, Wintaco Martinez LM, Puerto GM,  
446 Villalobos R. Tuberculosis por Mycobacterium bovis en trabajadores de fincas  
447 en saneamiento para tuberculosis bovina, de Antioquia, Boyacá y  
448 Cundinamarca. Rev Salud Pública. 2017 Feb 1;18(5):727.
- 449 25. Nuru A, Mamo G, Zewude A, Mulat Y, Yitayew G, Admasu A, et al. Preliminary  
450 investigation of the transmission of tuberculosis between farmers and their  
451 cattle in smallholder farms in northwestern Ethiopia: a cross-sectional study.

- 452 BMC Res Notes. 2017 Jan 7;10(1):31.
- 453 26. WHO | Tuberculosis and gender. WHO [Internet]. 2018; Available from:  
454 <https://www.who.int/tb/areas-of-work/population-groups/gender/en/>
- 455 27. N. Teppawar R, P. Chaudhari S, L. Moon S, V. Shinde S, A. Khan W, R. Patil  
456 A. Zoonotic Tuberculosis: A Concern and Strategies to Combat. In: Enany S,  
457 editor. Basic Biology and Applications of Actinobacteria. IntechOpen; 2018.
- 458 28. Instituto Nacional de Salud. Identificación de Riesgos Químicos Asociados al  
459 Consumo de Leche Cruda Bovina en Colombia [Internet]. Bogotá; 2011. 93 p.  
460 Available from: <https://www.ins.gov.co/Direcciones/Vigilancia/Publicaciones>  
461 [ERIA y Plaguicidas/ER PELIGROS QUIMICOS EN LECHE.pdf#search=leche](https://www.ins.gov.co/Direcciones/Vigilancia/Publicaciones/ERIA_y_Plaguicidas/ER_PELIGROS_QUIMICOS_EN_LECHE.pdf#search=leche)
- 462 29. Cascante JA, Pascal I, Eguía VM, Hueto J. Diagnóstico de la infección  
463 tuberculosa. An Sist Sanit Navar. 2007;30:49–65.
- 464 30. QIAGEN. FAQs for Health Professionals QuantiFERON ®-TB Gold [Internet].  
465 2016 [cited 2019 Apr 26]. Available from: [https://www.quantiferon.com/wp-](https://www.quantiferon.com/wp-content/uploads/2017/05/PROM-10157_FAQs-Health-Professionals-Rev001v02.pdf)  
466 [content/uploads/2017/05/PROM-10157\\_FAQs-Health-Professionals-](https://www.quantiferon.com/wp-content/uploads/2017/05/PROM-10157_FAQs-Health-Professionals-Rev001v02.pdf)  
467 [Rev001v02.pdf](https://www.quantiferon.com/wp-content/uploads/2017/05/PROM-10157_FAQs-Health-Professionals-Rev001v02.pdf)
- 468 31. Menzies D. What Does Tuberculin Reactivity after Bacille Calmette-Guérin  
469 Vaccination Tell Us? Clin Infect Dis. 2000 Sep 1;31(Supplement\_3):S71–4.
- 470 32. Akcay A, Erdem Y, Altun B, Usalan C, Agca E, Yasavul U, et al. The booster  
471 phenomenon in 2-step tuberculin skin testing of patients receiving long-term  
472 hemodialysis. Am J Infect Control. 2003 Oct;31(6):371–4.
- 473

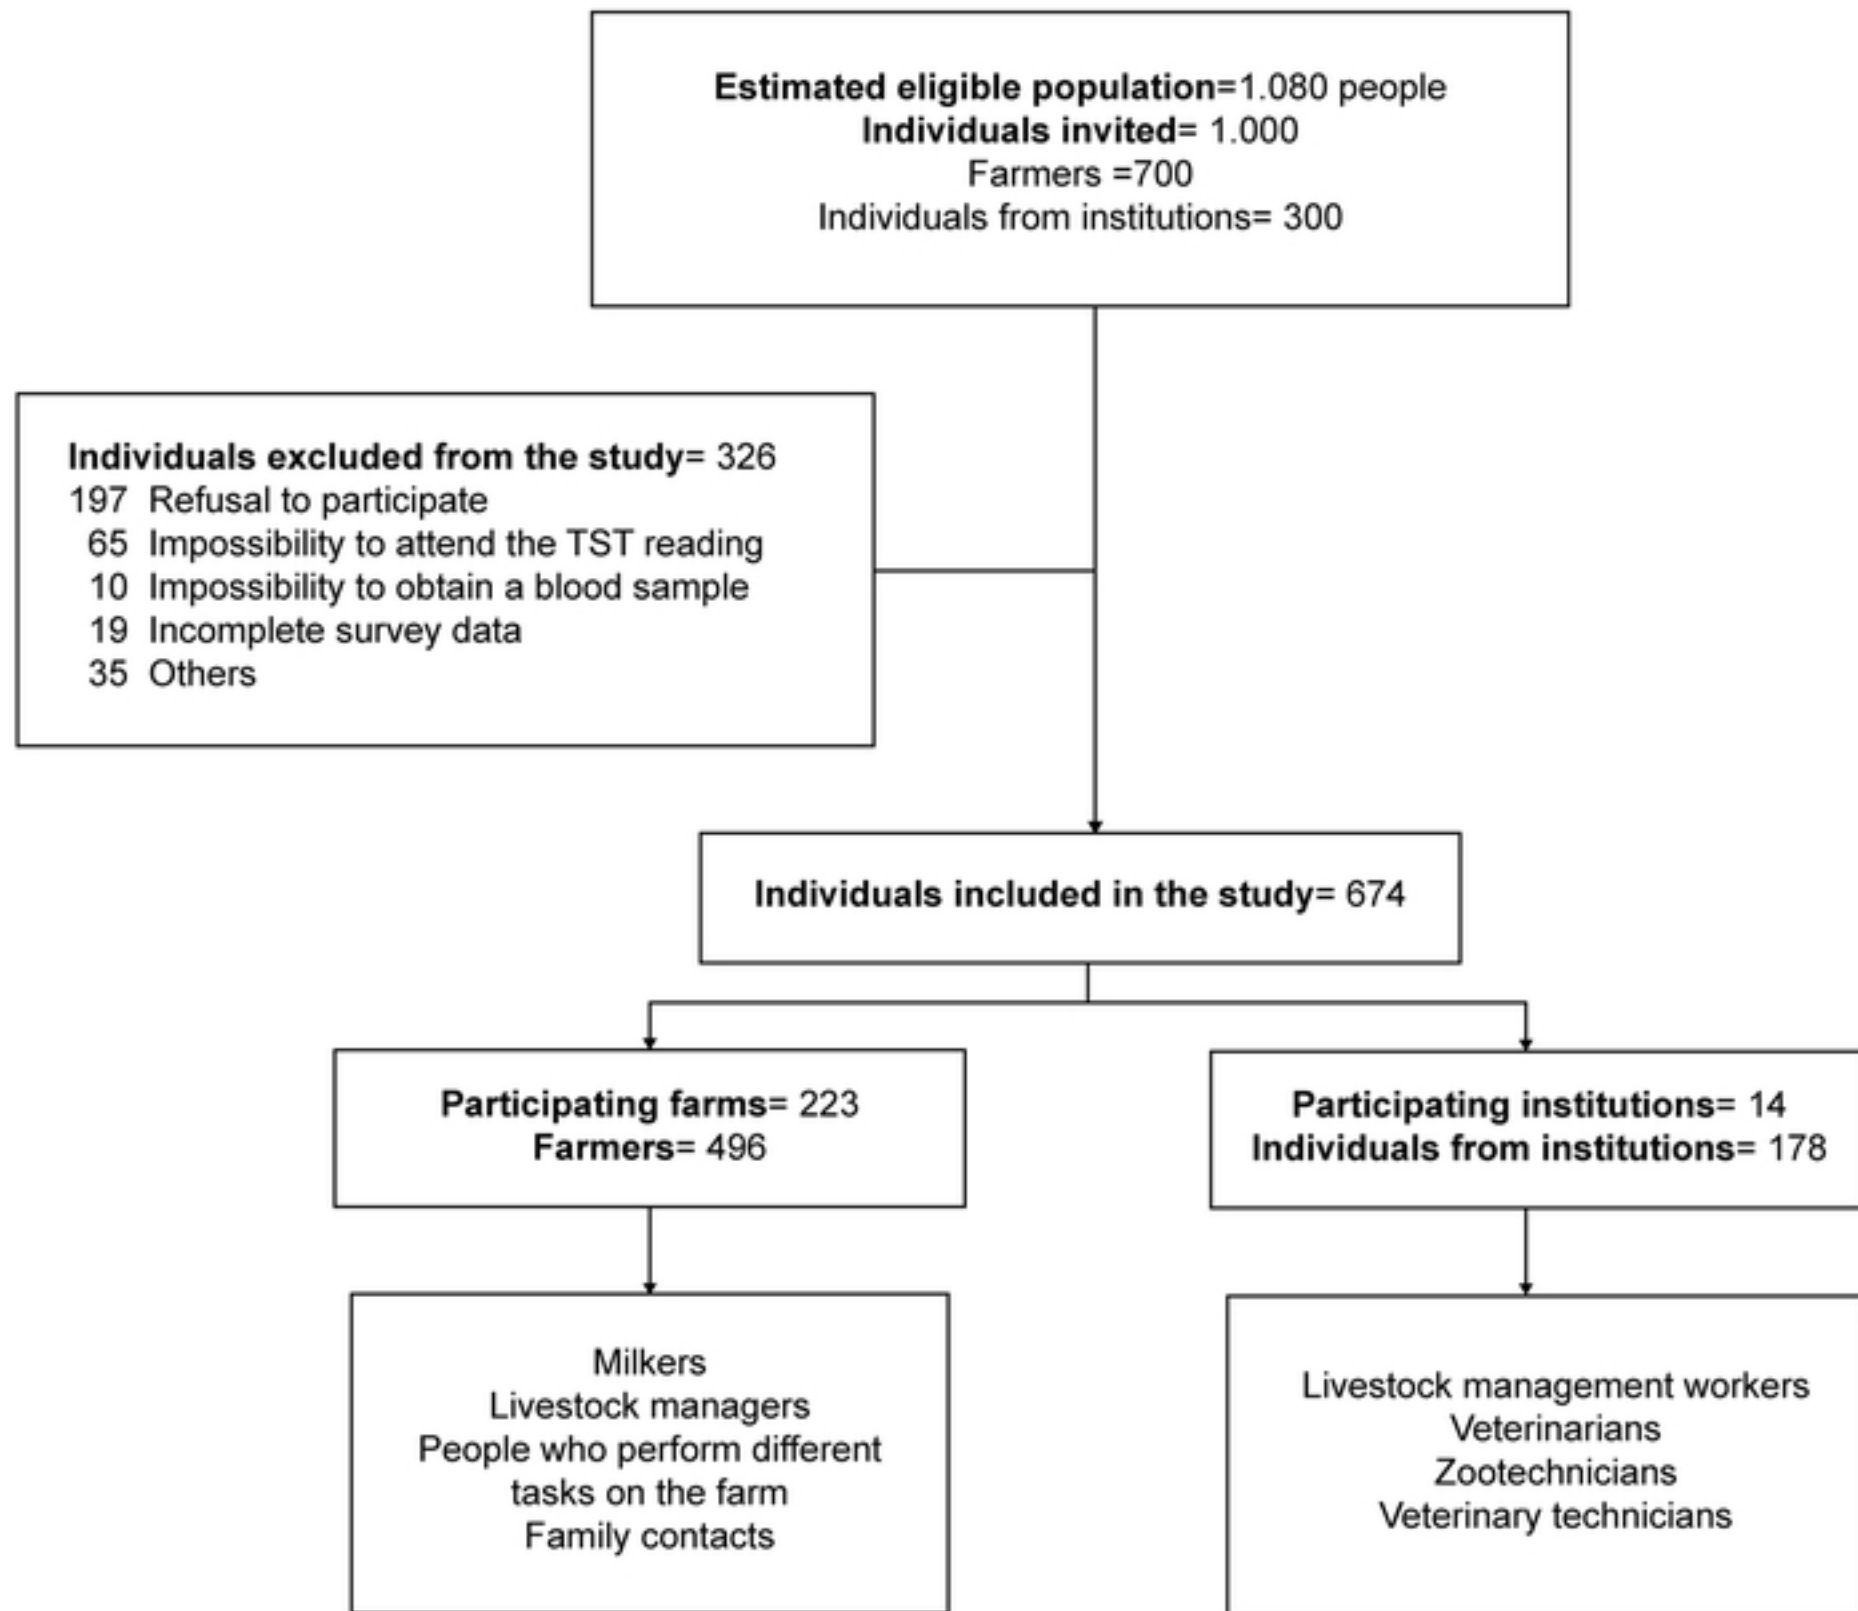

Figure 1. Admitted and analyzed population



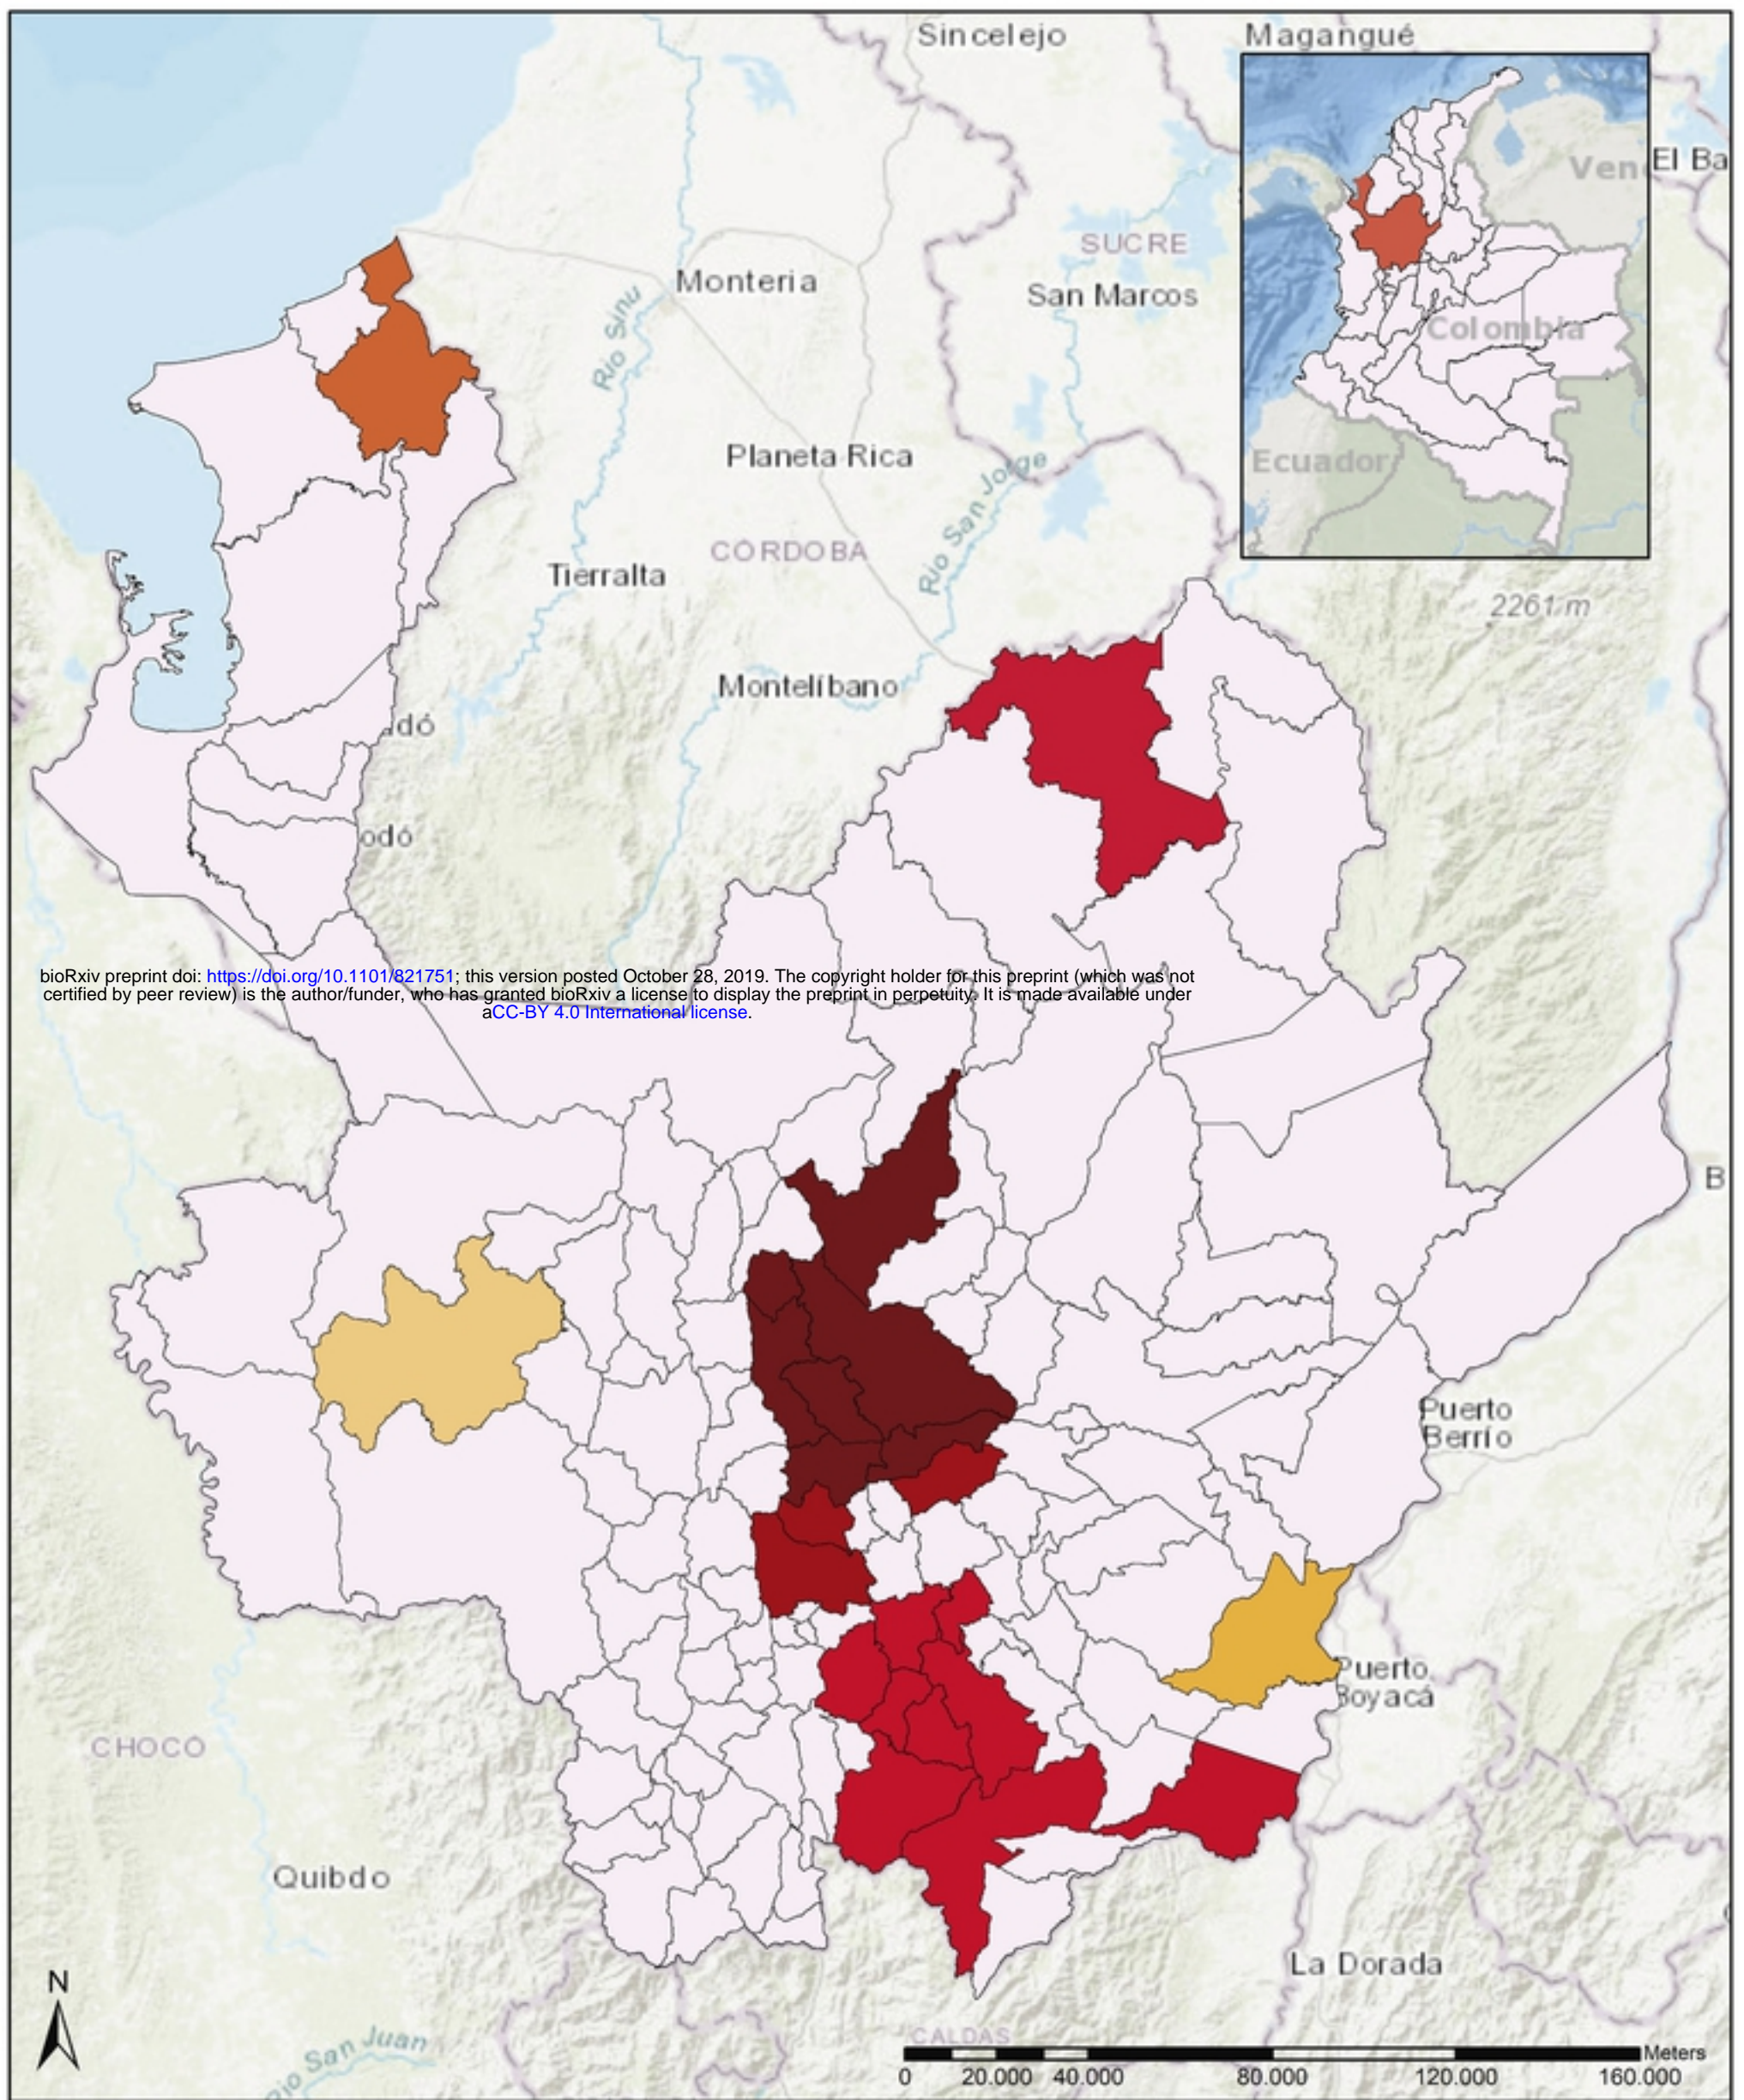

### Regions of the department of Antioquia

|                                                                                     |                 |       |                                                                                      |                 |      |
|-------------------------------------------------------------------------------------|-----------------|-------|--------------------------------------------------------------------------------------|-----------------|------|
|  | No data         |       |  | Bajo Cauca      | 4,9% |
|  | Northern region | 51,6% |  | Urabá           | 4,8% |
|  | Valle de Aburra | 24,3% |  | Magdalena Medio | 3,7% |
|  | Eastern region  | 9,1%  |  | Western region  | 1,6% |

ArcGis Software - ArcMap version 10.4.1.

Figure 2. Distribution of the population of study according to
